# Supplementary material for: SORBS1 suppresses tumor metastasis and improves the sensitivity of cancer to chemotherapy drug
Source: PubMed Central journal article supplement (PMC5354718; doi:10.18632/oncotarget.12851), 2016-10-24
Supplement: oncotarget-08-9108-s001.pdf [file oncotarget-08-9108-s001.pdf]

# SORBS1 suppresses tumor metastasis and improves the sensitivity of cancer to chemotherapy drug

## Supplementary Materials

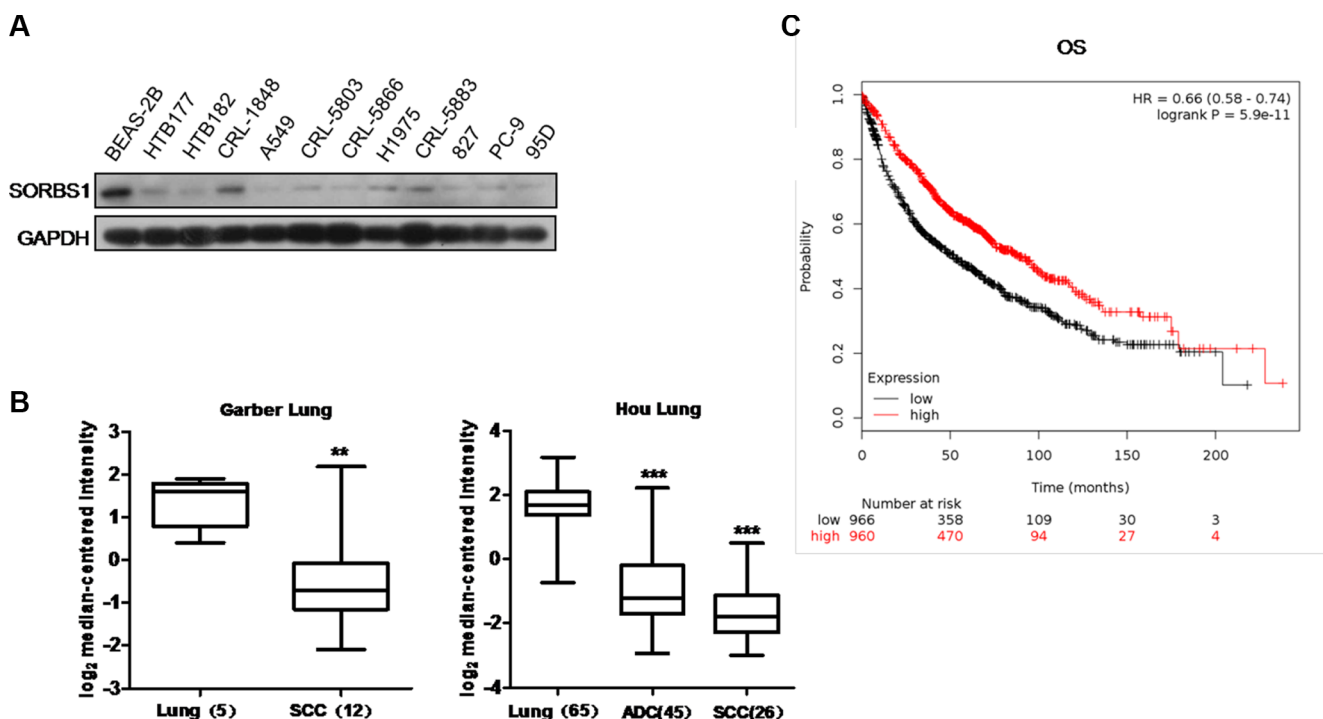

**Supplementary Figure S1: SORBS1 is expressed at lower levels in human lung cancer.** (A) SORBS1 protein levels were detected by western blot in normal lung epithelial cell line 2B and eleven other lung cancer cell lines. (B) The comparison of mRNA levels of *SORBS1* between normal lung tissue and squamous cell lung carcinoma (left panel) or lung adenocarcinoma (ADC) in published data sets from OncoPrint. \*\* $P < 0.01$ , \*\*\* $P < 0.001$ . (C) Kaplan-Meier survival analysis for assessment of overall survival (OS) of lung cancer based on tumor SORBS1 level in 1926 lung cancer patients. Survival curves were generated by using the Kaplan-Meier Plotter website based on data stratified based on the best cut-off. Curves were compared by hazard ratios (HR) and  $p$  values (log rank  $p$ ).

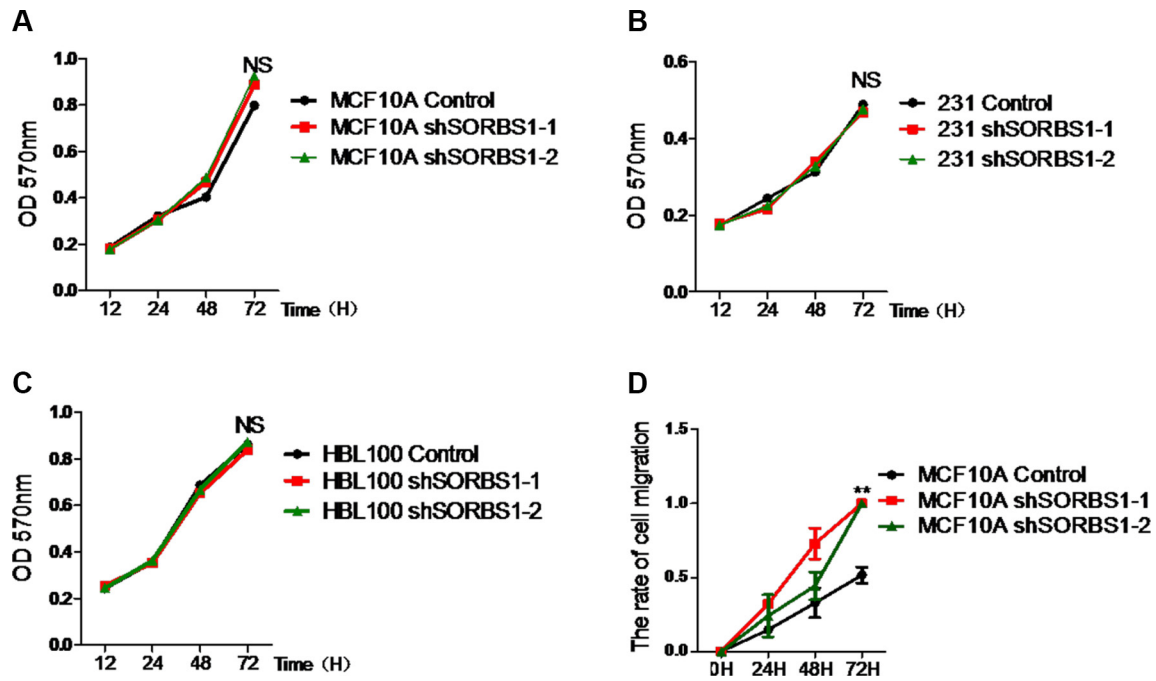

**Supplementary Figure S2: Loss of SORBS1 has no effect on cell proliferation but promotes migration in MCF 10A.** (A–C) MTT proliferation assay was performed in MCF 10A (A), MDA-MB-231 (B), HBL100 (C) and their respectively shSORBS1 cell lines. Data represent the mean  $\pm$  s.d. ( $n = 3$ ) from three independent experiments. NS: no significance. (D) Wound healing assay was conducted at 0, 24, 48 and 72 hours (H) to detect the ability of migration. Data represent the mean  $\pm$  s.d. ( $n = 3$ ),  $**P < 0.01$ , Student's *t*-test.

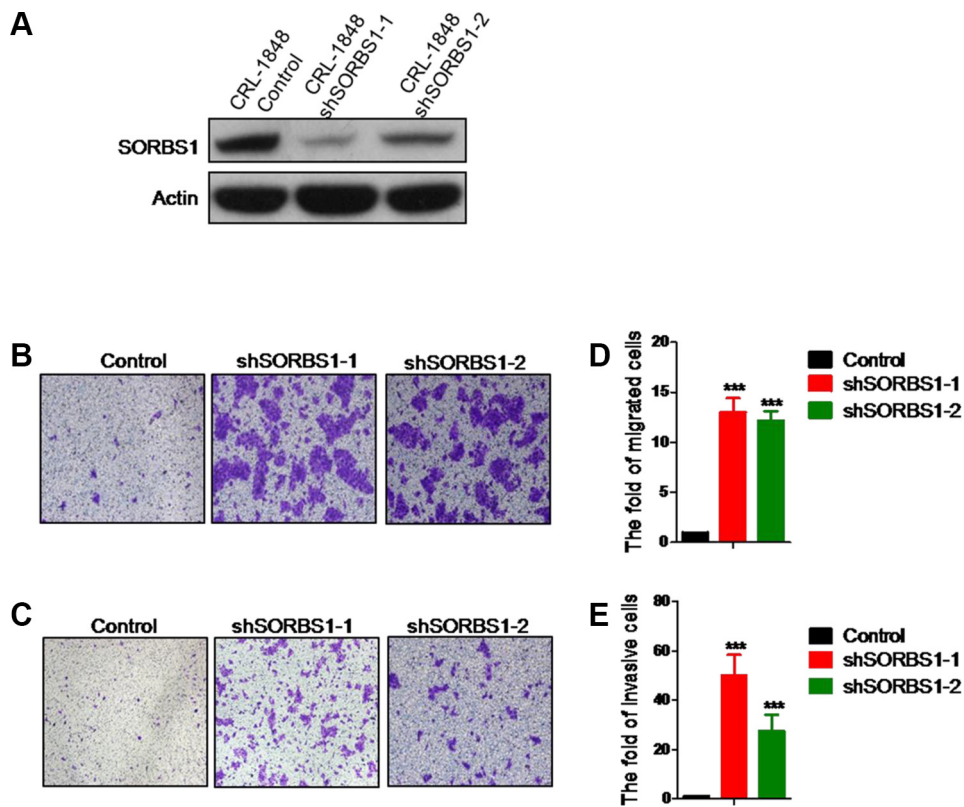

**Supplementary Figure S3: Loss of SORBS1 promotes migration and invasion in lung cancer cell.** (A) Western blot was performed to detect the expression levels of SORBS1 in lung cancer cell CRL-1848™ stably expressing control or shSORBS1. Transwell migration (B) and invasion (C) assay were conducted in CRL-1848™ control and shSORBS1 cell lines, in which cells (migration,  $4 \times 10^4$  cells/well; invasion,  $8 \times 10^4$  cells/well) were cultured for 24 hours. (D–E) Quantitative results were illustrated for panel B (D) and panel C (E). Data are shown as mean  $\pm$  s.d. ( $n = 3$ ),  $***P < 0.001$ , Student's *t*-test.

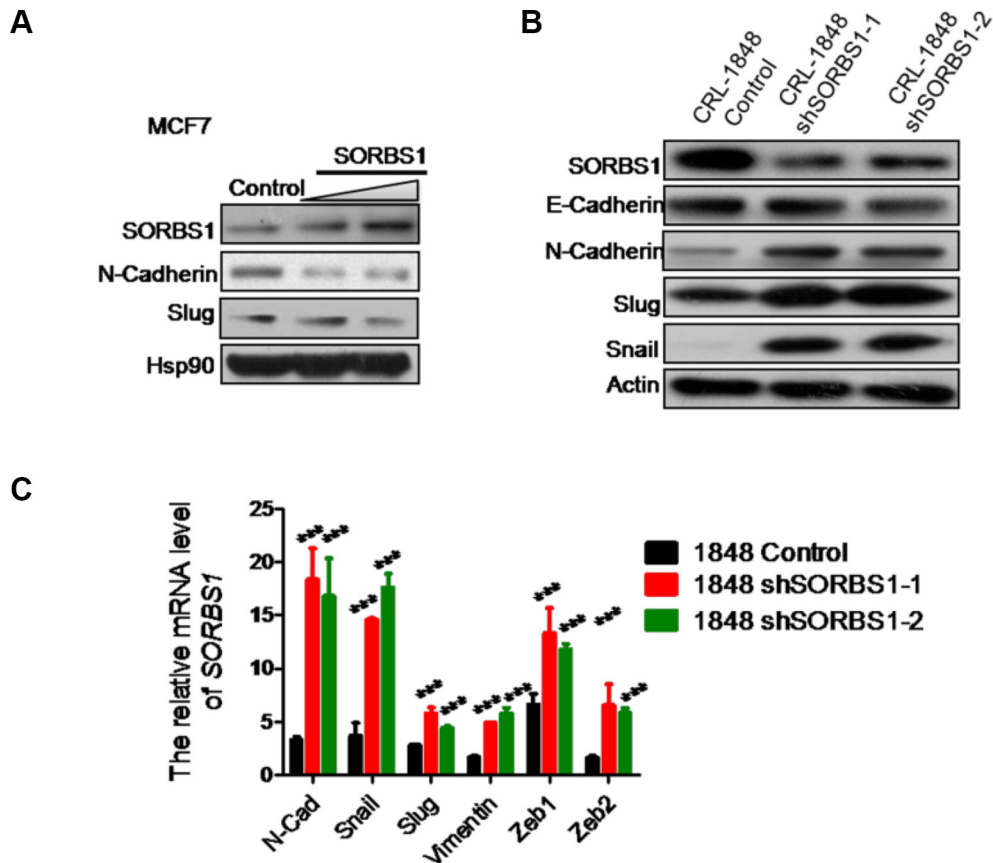

**Supplementary Figure S4: SORBS1 inhibits epithelial-to-mesenchymal transition in breast cancer and lung cancer cells.** (A) MCF7 cells were transiently transfected with control vector, 1  $\mu$ g or 2  $\mu$ g human *SORBS1*. After 48 hours, the protein expression of SORBS1 and EMT markers (N-cadherin, Slug) were detected by western blot. (B) The levels of SORBS1 and EMT markers were tested by western blot in CRL-1848<sup>TM</sup> control and shSORBS1 cell lines. (C) Quantitative real time PCR was performed to detect the mRNA levels of EMT markers in CRL-1848<sup>TM</sup> control and shSORBS1 cell lines. Data are shown as mean  $\pm$  s.d. ( $n = 3$ ), \*\*\* $P < 0.001$ , Student's  $t$ -test.

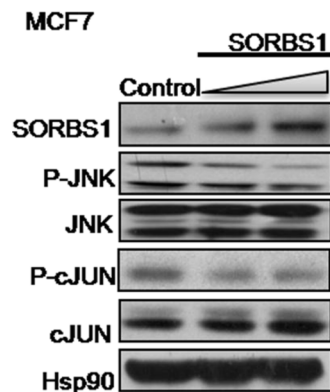

**Supplementary Figure S5: Overexpression of SORBS1 inhibits the JNK/c-Jun activation in MCF7.** The levels of JNK, P-JNK, c-Jun, P-c-Jun and SORBS1 in MCF7 control and MCF7 SORBS1 cells were detected by western blot.

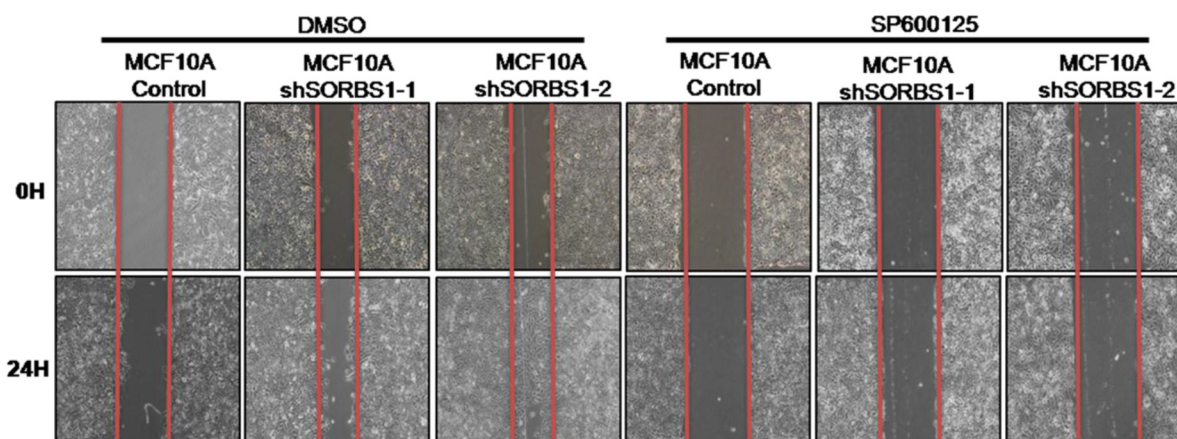

**Supplementary Figure S6: Inhibition of JNK activity decreases migration in MCF 10A shSORBS1 cells.** Migration were detected by wound healing in MCF 10A control and MCF10A.shSORBS1 cells treated with DMSO or sp600125 (10  $\mu$ M). Images were taken at 0 and 24 hours (H) with a 10 $\times$  objective lens.

### MCF7

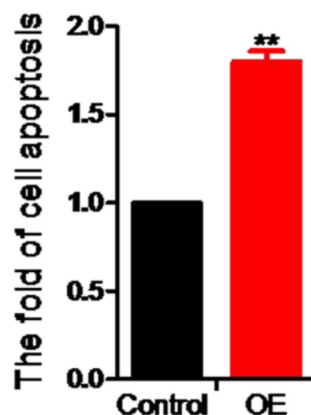

**Supplementary Figure S7: SORBS1 increases cisplatin induced-apoptosis in MCF7.** MCF7 cells were transiently transfected with 1  $\mu$ g of vector (Control) or human *SORBS1* (OE). After 24 hours, cells were treated with 10  $\mu$ g/ml cisplatin for another 24 hours. The rate of apoptosis was analyzed by FCM. Data are shown as mean  $\pm$  s.d. ( $n = 3$ ). \*\* $P < 0.01$ , Student's *t*-test.

**Supplementary Table S1: Original values of the data sets in breast cancer VS normal breast obtained from oncomine.** See Supplementary\_Table\_S1.

**Supplementary Table S2: Original values of the data sets in invasive breast cancer VS breast cancer obtained from oncomine.** See Supplementary\_Table\_S2.

**Supplementary Table S3: Original values of the data sets in lung cancer VS normal lung tissue obtained from oncomine.** See Supplementary\_Table\_S3.
